# Supplementary material for: Deep Immune Profiling of Multiple Myeloma at Diagnosis and under Lenalidomide Maintenance Therapy
Source: MDPI journal article supplement (doi:10.3390/cancers15092604), 2023-05-04
Supplement: s1 [file Table S2.xlsx]

## Sheet: Sup.Table S2
			Table S2. Gating strategy and abundance of immune populations of bone marrow
Populations				Mean ± SD, % GR, baseline	Mean ± SD, % PR, baseline	Mean ± SD, % Response	Mean ± SD, % Long Response	Mean ± SD, % Relapse	Mean ± SD, % HBM
NKs				7.7 ± 5.5	6.8 ± 6.7	13.6 ± 8.2	11.4 ± 8.5	3.9 ± 2.4	4 ± 2.3
	Early NKs			40.4 ± 16.2	51.2 ± 22.7	41.4 ± 17.2	41.9 ± 18.3	51.5 ± 24	55.8 ± 8.9
		Early NKs CD16+		24.4 ± 9.7	22.7 ± 7.2	26.5 ± 10.5	27.3 ± 13.9	20.8 ± 6.7	31 ± 4.1
			Cytotoxic NKs CD45RA+	92.1 ± 19.6	94.7 ± 9.1	98.3 ± 2.3	97 ± 7.3	94.1 ± 6.6	100 ± 0
		Early NKs CD16-		16.1 ± 14.3	28.5 ± 22.3	14.9 ± 14.4	14.6 ± 13.1	30.7 ± 27.6	24.8 ± 10.2
	Late NKs			59.6 ± 16.2	48.8 ± 22.7	58.6 ± 17.2	58.1 ± 18.3	48.5 ± 24	44.2 ± 8.9
		Late NKs CD16-		4.3 ± 3.8	2.5 ± 1.1	4.2 ± 2.8	3.9 ± 3.3	4.7 ± 2.3	3.6 ± 1
		Late NKs CD16+		55.2 ± 14.4	46.3 ± 23.1	54.5 ± 17.7	54.3 ± 19.1	43.8 ± 25	40.7 ± 8.6
HLA-DR+(DC)				3 ± 1.5	1.7 ± 1.5	2.3 ± 0.7	2.5 ± 0.7	1.5 ± 0.9	4.5 ± 1.6
	CD123+CD11c-:pDC			6 ± 4	5.5 ± 5.4	7.9 ± 5.2	8.9 ± 5.8	4.9 ± 4.1	11 ± 4.9
	CD11c+CD38+:mDC			34.5 ± 18	43.5 ± 10.2	50.8 ± 15.5	46.3 ± 14	51.2 ± 12	57.2 ± 3.7
	CD11c+HLA-DR+CD16-CD14-:conventional DCs			37.7 ± 18.8	42 ± 15.1	50.3 ± 15.8	46.9 ± 15.2	50.5 ± 15.1	56.6 ± 4
CD14+-CD11c+: Total Monocytes				32.2 ± 11.1	31.7 ± 14.1	22.2 ± 7.9	28.9 ± 9.8	24.1 ± 9.4	24 ± 7.6
	CD14+CD38+: Classical Monocytes			56.8 ± 9.6	58.5 ± 21.3	66.6 ± 13.1	62.6 ± 11.4	59.6 ± 19.6	65.9 ± 5.3
		Classical Monocytes+Chemokines+		5.8 ± 6.3	16.5 ± 18.4	6.8 ± 6	7.4 ± 5.6	8 ± 6.5	3.3 ± 1.1
	CD38-CD14-: Nonclassical Monocytes			6.8 ± 4.8	3.1 ± 1.8	3.3 ± 4.1	3.7 ± 2.2	1.6 ± 1.1	3.4 ± 2.3
	CD38lo-CD14int: Transitional Monocytes			24 ± 11.5	26 ± 14.2	18.8 ± 10.7	24.1 ± 10.9	27.1 ± 15.4	9.6 ± 5
CD45+CD3+( T cells)				15.2 ± 10.1	7 ± 4	20.3 ± 7.2	21.2 ± 9.7	8.7 ± 4.4	28.4 ± 10.5
	CD28+CD161+CD4-MAIT+NKT+			3.7 ± 3.4	7.2 ± 4.8	3.9 ± 2.7	4.4 ± 2.6	3.1 ± 2.2	9.8 ± 3.1
	CD4+CD8-: CD4 aß T cells			30.8 ± 10.2	35.9 ± 13.8	23.8 ± 7.1	29.1 ± 12.3	37.4 ± 14.6	60 ± 18.5
		CD4+CD45RA-CCR4+		5.9 ± 5.4	7.3 ± 3.9	8.1 ± 3.4	9.3 ± 4.5	18 ± 15.8	11.7 ± 3.7
		CD25hiCD127low-: Treg		0.5 ± 0.6	0.5 ± 0.4	1 ± 0.5	0.6 ± 0.4	1.5 ± 1.3	0.6 ± 0.5
		CXCR3-CCR6+: Th17-like		0 ± 0.1	0.1 ± 0.1	0 ± 0	0.1 ± 0.2	0.3 ± 0.5	0.1 ± 0
		CXCR3-CCR6-: Th2-like		3.9 ± 4	6.3 ± 3.6	6.6 ± 2.9	6.9 ± 3.8	16.5 ± 12.5	9 ± 4
		CD45RA+CD45RO-: CD4 Naive		4.8 ± 3.5	7.1 ± 7.1	0.8 ± 0.6	1.4 ± 2	2 ± 2	25.9 ± 9.4
		CD45RA-CD45RO+: CD4 Central Memory		3.6 ± 2.6	9.3 ± 8.8	2.4 ± 1.1	3.5 ± 3.4	8.4 ± 5.6	13.9 ± 2.9
		CD45RO+CD27+: CD4 Effector Memory		3.2 ± 5.2	3.5 ± 2	4.9 ± 3.2	4.7 ± 2.1	8.8 ± 9.4	4.9 ± 1.6
		CD45RO+CD27-: CD4 Terminal Effector		9.2 ± 5	7.4 ± 6.8	10.7 ± 5.3	11.6 ± 7	12.4 ± 9	5.2 ± 3.8
		CD4+CD27+CCR7+CD127+		8.5 ± 7.1	13.8 ± 12.7	4.1 ± 2.3	6.6 ± 5.9	12.9 ± 11.9	29.2 ± 17.3
		CD4CTL		9.1 ± 6.7	6.6 ± 9.5	6.1 ± 6.2	7.9 ± 9.7	5.9 ± 7.7	1.9 ± 1.9
	CD4-CD8+(CD8 aß T cells)			57.7 ± 13.5	50.4 ± 16.3	68.1 ± 8	62.5 ± 12.5	52.6 ± 16.5	33.8 ± 16.8
		CD8 Senescent (CD8+CD45RA+CD27-CD57+)		27.6 ± 14.9	22.5 ± 11.3	23 ± 13.5	23.4 ± 14.6	16.6 ± 14.9	8.5 ± 9.5
			CD8 Senescent NKT CD161-	11.3 ± 9.4	9 ± 6.9	7.6 ± 6.6	8.4 ± 4.9	2.5 ± 2.7	1.3 ± 0.9
			CD8 Senescent NKT CD161+	1.6 ± 2.9	0.8 ± 0.6	3.2 ± 6.1	4.1 ± 7.1	0.3 ± 0.4	0.2 ± 0.1
			CD8 Senescent CD161+	2.2 ± 2.8	1.7 ± 1.7	1.7 ± 1.9	2.2 ± 2.3	0.8 ± 0.8	0.7 ± 0.7
			CD8 Senescent CD161-	12.5 ± 7.5	11 ± 10.8	10.6 ± 6.2	8.7 ± 5.5	13 ± 14.1	6.3 ± 8
		CD8+CD161+ T cells		10.5 ± 5.8	8.5 ± 2.8	11.1 ± 9.2	13.4 ± 10.7	5.5 ± 1.8	6.6 ± 5.2
		CD45RA+CD45RO-: CD8 Naive		1.4 ± 1	3.2 ± 2.7	0.9 ± 1	1.3 ± 1.2	3.9 ± 4.1	5.7 ± 2.3
		CD45RA-CD45RO+: CD8 Central Memory		0.6 ± 0.6	2.8 ± 3.8	1.3 ± 2.3	1.2 ± 1.7	6.3 ± 5.2	3 ± 1.9
		CD8+CD27+: CD8 Effector Memory		9.3 ± 3.7	10.3 ± 7.9	23.7 ± 15.2	19.3 ± 10.1	10.8 ± 5.4	5.7 ± 3.2
			CD8 CD27+CD28+CD45RO+CD57+	43 ± 11.2	48.4 ± 12.3	29.7 ± 10.6	27.6 ± 10.9	35.6 ± 12.5	27.5 ± 4.9
		CD8+CD27-: CD8 Terminal Effector		42.3 ± 16.5	30.6 ± 13.6	40 ± 14.7	39 ± 13.3	28.3 ± 21.7	14.5 ± 11.9
		CD8CTL		44.2 ± 15.5	32.1 ± 14.1	41.5 ± 14.7	40.1 ± 14	31.1 ± 23.4	17.9 ± 14.1
	MAIT/NKT (CD3+CD28+CD161+)			9.6 ± 5.9	15.8 ± 10.5	9.3 ± 3.4	10.6 ± 3.9	15.1 ± 8.5	20.1 ± 4.3
		CD4+ MAIT		5.6 ± 4.3	9 ± 8	4.4 ± 1.7	5.3 ± 2.1	9.7 ± 6.3	14 ± 3.2
		CD8+ MAIT		2.7 ± 2.1	3.1 ± 2.9	3.8 ± 1.8	3.7 ± 1.9	3.1 ± 1.2	4.3 ± 2.4
		CD4+ NKT		0.3 ± 0.3	1 ± 0.8	0.3 ± 0.2	0.6 ± 0.8	0.8 ± 0.8	0.1 ± 0
		CD8+ NKT		0.4 ± 0.2	1.5 ± 1.5	0.5 ± 0.2	0.7 ± 0.3	0.8 ± 0.8	0.5 ± 0.4
	CD3+TCRγδ+: CD4-CD8-aß T cells			3.4 ± 2.6	5.1 ± 4	2.1 ± 3	1.8 ± 1.8	3.1 ± 1.6	1.1 ± 0.6
		CD4-CD8-TCRγδ+CD57+		1.4 ± 1.3	2.4 ± 2.1	1.2 ± 1.7	1 ± 1.1	1.9 ± 1.4	0.5 ± 0.4
CD19+CD3-: Total B cells				3.4 ± 2.1	2.3 ± 1.7	5.2 ± 4.1	3.7 ± 4.1	4.4 ± 2.9	6.1 ± 2.6
	CD19+CD11c+:ABCs (age associated B cells)			13 ± 9.7	18.5 ± 8.1	9.2 ± 5.9	13.5 ± 14.8	17.1 ± 15.6	5.3 ± 1.7
	CD19+CD27+: Total Memory B cells			24.2 ± 12.3	38.1 ± 15.5	8.2 ± 7.8	11.5 ± 6.2	15 ± 13.9	6.6 ± 0.9
		CD38+CD20-: Plasmablasts		9.4 ± 9	9.4 ± 12.1	24.6 ± 11.1	25.3 ± 12.6	18.9 ± 11.7	2.6 ± 1.5
	CD19+CD27-: Naive B cells			75.5 ± 12.4	61.5 ± 15.6	91.6 ± 7.9	88.4 ± 6.3	84.8 ± 14	93.1 ± 1
	IgD+ Memory B cells			1.3 ± 1.2	2.9 ± 3	4.2 ± 5.7	2.4 ± 2.4	2.4 ± 2.3	0.5 ± 0.9
	IgD- Memory B cells			10.4 ± 10.1	16 ± 8.4	18.7 ± 15.4	21.5 ± 14.4	18.4 ± 8.8	10.8 ± 8.3
	Naive B cells			54.7 ± 18.4	41.2 ± 16	75.9 ± 18.9	68.9 ± 20.2	68 ± 18.8	69.5 ± 15.9
CD45-CD66b+ (Granulocytes)				9.3 ± 6.5	8.3 ± 7.6	7.7 ± 3.6	7.2 ± 3.4	7.5 ± 8.2	10.6 ± 7.1
	CD294+CD16-:Eosinophils			30.3 ± 16.3	33.5 ± 20.4	58.7 ± 16.7	54.7 ± 21	37.6 ± 11.9	64.8 ± 7.4
		Eosinophils CD25+		5.7 ± 4.6	6 ± 4.4	26.3 ± 23.2	19.5 ± 19.1	10.4 ± 7.4	4.4 ± 2.7
	CD294-CD16+: Neutrophils			47.3 ± 25.1	42.7 ± 26.9	23 ± 14.2	21.8 ± 17.3	34.4 ± 21.5	8.5 ± 3.8
	CD123+CD294+: Basophils			3.1 ± 4.4	0.6 ± 0.4	2.9 ± 3.3	2 ± 3.4	0.4 ± 0.2	2.6 ± 0.4
CD45-CD14+: new				8.4 ± 7	14.5 ± 10.5	6.4 ± 5.7	7.8 ± 6.2	13.5 ± 13.5	3.8 ± 2.3
	CD45-CD14+ ChReceptors+			2.7 ± 3.4	7.6 ± 9.1	1.7 ± 1.8	2 ± 1.8	6.2 ± 8.8	1 ± 0.6
CD45-CD56+CD38+ Malignant cells				3.6 ± 3.2	14.8 ± 16.4	1.5 ± 0.8	2.4 ± 1.4	13.5 ± 17.2	2.5 ± 1.7
	CD45-CD56+CD38+ Malignant cells+CXCR3+CXCR4			2.5 ± 2.9	9.3 ± 9.9	1.1 ± 0.7	1.5 ± 1	7.8 ± 12.1	1.4 ± 0.9
	CD45-CD66b-CD56-CD38-CD14+			5.7 ± 4.5	4.3 ± 1.7	5.2 ± 5	6.1 ± 5.5	5 ± 3.2	2.3 ± 1.4
		CD45-CD66b-CD56-CD38-CD14+ChReceptors+		1.3 ± 0.9	0.8 ± 0.4	1.3 ± 1	1.4 ± 1.3	1 ± 0.6	0.6 ± 0.4
