# Supplementary material for: Deep Immune Profiling of Multiple Myeloma at Diagnosis and under Lenalidomide Maintenance Therapy
Source: MDPI journal article supplement (doi:10.3390/cancers15092604), 2023-05-04
Supplement: s1 [file Table S3.xlsx]

## Sheet: Table S3
Table S3. Cytogenetics information and BM sample collection timepoints
Patient	Good or bad responder cohort	Cytogenetic risk stratification*	Cytogenetic findings	Diagnosis phase BM sample collection, days before treatment start	Best response BM sample collection, months after ASCT	Long response BM sample collection, months after ASCT	Relapse sample collection, months after ASCT
1	Good	Standard	hyperdiploidy, +5, +7, +9	1	50	70
2	Bad	High	t(14;16), -16, +22, +14q32	1			5
3	Bad	High	t(4;14), +1q, del(13)	4			6
4	Bad	High	t(11;14), +1q, +11, 14q32 translocation	6			10
5	Bad	High	hyperdiploidy, +1q, +5, +9, +11, +15, 14q32 translocation	21			14
6	Good	Standard	no FISH findings	1	24	64
7	Good	Standard	hyperdiploidy, +5, +9, +11, +15, del(13)	22	9	65
8	Good	Standard	t(11;14), +14q32	0	24	62
9	Good	High	del(17p13) (85%), del(13), +1q, +14q32	27	9	62
10	Bad	Standard	del(13)	19	15
11	Good	High	+1q, der(17)	12	39	59
12	Good	High	del(13), del(14q32), +1q	16	24	60
13	Bad	High	del(17p13) (82%)	0			26
14	Good	Standard	no FISH findings	0	34	55
15	Good	Standard	no FISH findings	0		60
16	Good	Standard	no FISH findings	5	32	53
17	Good	Standard	+14q32	0	28	49
18	Bad	Standard	del(1p32), del(14q32)	0
Abbreviations: BM bone marrow, ASCT autologous stem cell transplantation
*high, if t(4;14), t(14;16), t(14;20), del(17p13), or +1q by FISH. Otherwise standard.
