# Supplementary material for: Deep Immune Profiling of Multiple Myeloma at Diagnosis and under Lenalidomide Maintenance Therapy
Source: MDPI journal article supplement (doi:10.3390/cancers15092604), 2023-05-04
Supplement: s1 [file Table S4.xlsx]

## Sheet: Sup. Table S4
Table S4. Median raw marker expression values for different cohorts of patients
	Metacluster 1					Metacluster 2					Metacluster 3					Metacluster 4					Metacluster 5					Metacluster 6					Metacluster 7					Metacluster 8					Metacluster 9					Metacluster 10
Markers	GR, baseline	BR, baseline	Response	LongResponse	Relapse	GR, baseline	BR, baseline	Response	LongResponse	Relapse	GR, baseline	BR, baseline	Response	LongResponse	Relapse	GR, baseline	BR, baseline	Response	LongResponse	Relapse	GR, baseline	BR, baseline	Response	LongResponse	Relapse	GR, baseline	BR, baseline	Response	LongResponse	Relapse	GR, baseline	BR, baseline	Response	LongResponse	Relapse	GR, baseline	BR, baseline	Response	LongResponse	Relapse	GR, baseline	BR, baseline	Response	LongResponse	Relapse	GR, baseline	BR, baseline	Response	LongResponse
CD45	371.674	416.537	272.121	299.176	384.45	356.205	394.389	402.688	377.015	447.972	4.91608	2.41388	2.83021	5.43126	15.5458	57.6055	58.8529	50.2498	40.9885	62.1882	4.9323	4.27861	3.75888	4.56943	3.85316	142.233	163.591	137.419	118.455	142.908	192.729	249.064	183.208	145.415	254.569	28.7898	9.09197	32.9092	9.64393	18.2115	381.104	432.234	374.105	344.471	434.249	330.865	383.425	373.356	331.291
CD19	323.928	464.996	172.255	205.894	315.348	2.91216	4.69296	4.50563	3.59232	4.99798	2.5467	0.39931	3.3901	6.14624	0.838829	5.89267	18.3799	10.9355	7.65591	10.3764	0.211664	0.618761	0.732522	0.435172	0.691338	6.05851	7.63764	8.89771	7.44917	8.73747	2.38355	5.82942	4.26456	2.77789	5.38912	2.81277	5.81844	46.4852	12.198	4.97597	7.42438	12.5866	7.93481	5.98547	10.3405	6.26027	8.39496	8.9881	7.1738
CD20	178.061	203.276	100.373	121.131	185.434	2.16332	1.60103	1.46748	1.32496	1.36563	0.554229	0	3.80238	0.526221	0	5.55023	6.62696	6.65786	5.83922	5.44579	0.563915	0.547702	0.206125	0.308024	0.669109	1.29449	0.7991	0.683682	0.373829	0.719665	2.79982	2.87651	2.83211	2.75169	2.72744	33.557	2.60182	25.7106	1.90858	2.46925	5.9527	5.74693	3.11134	2.85159	3.34112	5.65303	5.00715	4.95637	4.85374
IgD	183.593	130.537	254.501	271.389	273.343	2.50927	4.57632	1.19885	0.330179	3.7647	0.195662	0.133872	0.0806107	0.435697	0.919719	47.7703	85.4381	31.5828	28.5585	17.0724	3.31279	3.98895	2.14094	2.19982	4.16485	4.9987	8.18272	4.12215	3.66041	8.02516	12.203	17.1163	14.3784	12.6538	16.2483	10.9691	11.7495	15.6085	11.9941	11.6287	0	0	0	0.00372727	0.0688165	7.27302	8.90696	7.95173	6.49119
CD38	18.6673	14.9625	17.6797	17.5921	24.4929	7.68738	7.62804	7.83751	7.5148	6.48281	1607.77	1291.38	2381.09	1551.27	1086.51	11.2467	16.3517	13.6721	12.4783	19.8934	2.82905	3.0646	2.9451	3.8374	3.18869	201.005	147.536	137.099	116.853	105.959	72.9965	61.8633	100.305	79.584	72.8532	804.733	729.699	1095.89	475.063	614.083	3.26349	4.1402	6.1611	3.53105	5.70101	5.82293	6.17015	15.4729	9.77011
CD56 (NCAM)	0.449677	0.251423	2.56945	2.60503	1.23939	3.78065	6.88274	2.34156	3.30208	5.08493	211.888	347.404	213.43	135.863	537.073	16.1381	23.5127	18.3632	17.0802	23.2983	4.42916	5.73817	3.0622	3.12064	5.04262	7.36967	10.378	6.87396	5.86997	8.75044	16.596	26.8364	18.7662	17.8498	26.842	143.715	195.663	83.1775	38.3119	231.987	16.8545	19.4134	8.38926	10.3588	0.745198	14.5722	15.1647	13.7077	16.1098
CD57	0.297192	0.152264	1.43063	1.33063	1.23277	75.5502	14.5882	13.1959	40.3615	5.04012	1.71946	0.436154	0.292935	0.972973	1.29887	3.78287	5.65819	4.71289	4.47799	5.81227	0.969119	0.633403	1.4108	1.42328	1.1307	0.556894	2.63666	0.81765	0.894528	2.45626	1.54608	2.68021	2.02529	2.17499	3.08717	1.86506	2.99611	5.25572	1.85495	3.61418	716.295	571.109	398.427	327.406	458.238	219.01	124.899	192.867	211.003
CD161	0	0.123472	0.90094	0.646287	0.459159	1.02616	1.67843	0.66359	0.950814	1.55396	0.129088	0.352949	0.525	0.812724	0.54417	5.64739	5.435	6.14933	5.10981	6.1435	0.199185	0.455942	0.149559	0.160355	0.426522	0.701063	1.17575	0.484441	0.25738	0.942348	2.41628	3.68726	2.96811	2.57021	3.41435	3.11821	3.9413	11.1045	2.958	3.23701	0.437439	0.595867	0.629496	1.52489	0.186021	2.38539	2.87311	2.43288	3.54533
CD45RA	215.39	356.154	126.266	155.231	353.642	17.8504	12.2117	9.34856	8.77627	6.15375	0.763655	0.575615	1.04047	3.31674	2.89787	7.00527	7.18732	10.4224	9.59205	6.76767	0.514798	1.1403	0.886556	0.907943	0.9473	39.1056	48.3004	34.7135	53.8069	40.7256	9.71791	7.48871	10.7624	9.2428	6.05775	3.76872	3.84346	36.9632	3.95792	2.36753	115.948	66.45	97.7048	150.962	36.2693	75.5545	35.871	56.5955	93.7418
CD45RO	0.0986531	0.823785	15.1418	13.9351	2.09783	16.6562	25.7963	54.4264	48.6981	49.4981	1.01363	1.32761	1.30051	1.82403	1.87693	18.2741	20.6303	22.4462	18.2207	23.8142	1.03589	2.04625	1.32526	1.47954	1.68564	9.07292	7.60336	12.5518	6.1496	7.96204	17.5644	30.47	29.3637	22.4501	35.8364	9.96659	14.2979	40.891	12.9382	13.2393	3.46987	10.3325	14.6028	9.71097	24.1313	9.2692	13.7193	20.5291	17.3259
TCRgd	0.615653	1.32774	12.726	16.1039	2.7581	6.29495	16.4011	3.01171	2.39472	11.4029	12.0899	14.5766	13.9322	6.78921	18.8857	53.5114	70.1363	62.6768	52.426	57.7257	8.3566	14.0179	6.34466	6.84446	10.684	11.7256	19.558	11.9522	9.9327	16.8561	31.7103	57.1945	37.5832	33.3241	53.2804	40.4818	58.9063	126.023	43.8673	56.1628	0.589855	1.60516	0.576308	1.1485	0.849053	21.5902	32.1465	22.2786	21.7607
CD3	0.0791728	0	0.604968	0.551333	0.37099	214.744	224.442	212.325	193.992	191.787	1.02589	0	0.307882	0.992708	0	4.03447	4.91076	3.97466	3.86477	3.7046	0.893989	0.902646	0.35319	0.423672	0.476881	0.716429	1.66271	0.513498	0.475675	0.826446	3.25993	3.87289	3.32188	3.27393	3.94648	1.51609	2.33149	3.50065	1.80046	2.34796	197.216	191.086	183.09	174.952	148.152	161.374	168.727	160.801	154.133
CD4	1.47692	3.17918	2.3645	1.62751	2.72012	92.832	103.338	147.23	135.743	122.615	0.222052	0.0738435	0.162333	0.998761	0.91638	0.421845	1.41928	1.11967	0.789354	2.18482	0	0	0	0.0335506	0.0391766	10.3578	10.5147	7.71734	15.0025	12.3808	6.33246	7.57207	8.27882	6.81248	7.92832	0.0108232	1.01256	2.21777	2.12577	1.38323	0.145641	0.364734	0.395753	0.262892	0.596254	0.27766	0.458236	0.847316	0.647251
CD127 (IL-7Ra)	5.05351	14.8235	18.2591	10.0805	16.4194	60.2267	103.64	78.2429	69.4172	82.2095	0.75353	0.727111	4.382	2.84466	1.81414	16.1514	20.8553	38.027	20.2151	19.2106	2.65785	3.75053	7.03325	3.00287	2.69365	4.50678	10.055	12.8881	4.63572	10.1405	10.1257	19.7904	21.6407	11.3918	18.5293	6.19593	11.2534	16.3883	10.3718	9.50552	5.21653	23.8373	15.5089	9.57515	33.3304	14.7227	28.5135	23.4681	14.6844
CD8a	0.894094	1.96343	1.03518	1.00529	2.12038	3.19456	3.46448	5.73463	5.56843	4.67	0.0397212	0	0.177167	0.516834	0.742774	0.735176	0.768223	0.876296	0.442845	1.28585	0	0	0.00145455	0.05336	0.0693156	0.526871	0.800559	0.825943	1.0471	1.14157	0.290574	0.523654	0.602876	0.357408	0.724353	0.0733706	0.132899	2.27365	0.178922	0.437831	221.308	215.959	284.009	258.722	214.013	99.6761	90.8179	136.099	122.288
CD28	8.15279	12.2902	6.89276	6.98241	9.17117	18.9874	28.0344	46.1382	37.9745	46.9303	8.43544	5.07291	9.64462	5.05985	15.0255	2.39027	5.40778	4.16302	3.74494	5.92162	0.0366367	0.536808	0.0261758	0.0771578	0.64614	0.712788	2.07882	0.769557	0.509097	1.7839	1.52368	3.4333	2.10389	1.85522	3.09826	8.52801	9.66789	17.4803	6.89442	14.4042	0.630115	6.25023	2.6136	2.6012	14.9776	2.89766	5.59646	4.40049	4.31225
CD27	3.33906	9.08292	0.366351	0.34933	0.448342	21.9865	23.2539	15.4009	23.7565	30.1015	23.251	17.5083	11.1777	64.8684	0.0195706	0.31712	1.18786	0.566062	0.363846	1.37239	0	0	0	0	0	0.0139246	0.783769	0.0877692	0	0.418448	0.976683	2.17847	1.33184	0.952359	2.03525	7.54245	7.23407	15.3278	11.539	2.14275	3.42255	8.41208	8.90364	5.25995	35.0497	3.46789	5.59901	7.83943	3.44104
CD66b	10.7883	12.7004	122.072	107.07	21.8829	1.55352	2.17626	0.926984	1.06178	0.872512	1.27607	0	0.119239	2.58623	0.699083	242.027	203.413	244.615	182.905	254.421	0.722522	0.696735	0.381005	1.1726	0.246025	1.723	12.2556	1.69683	1.65201	2.4642	11.881	8.27802	7.00612	12.5815	6.46773	5.15132	4.25707	4.45709	2.56596	5.69265	0.0740821	0.0237949	0	0.420172	0.0107161	3.94522	2.829	3.75717	5.55482
CD294	5.71962	9.50602	23.7775	19.4576	13.3961	5.16998	7.7136	3.05462	2.44299	6.18285	0.452036	0.937722	0.471964	0.56243	1.07211	23.6209	26.1099	29.3885	27.1898	21.6034	3.44501	4.25714	2.54388	2.77622	3.15791	21.4355	18.1275	22.1528	11.6369	14.8432	16.853	21.6947	18.7798	17.191	20.6523	12.9652	14.9007	40.6279	14.2419	12.4945	2.04124	1.99851	1.72354	2.84341	3.97908	11.3394	11.6147	11.1232	12.0743
CD25 (IL-2Ra)	0.171474	0.460994	2.2686	2.02402	0.374404	0.194667	0.367533	1.33335	0.554787	0.461522	0.492475	0.457537	1.00763	0.0643596	0.722083	1.4141	1.49796	4.86276	2.15005	1.19627	0.11736	0.214627	0.781099	0.265982	0	0.592899	1.69718	1.31748	0.40847	0.107369	0.424106	0.959846	1.79165	0.664338	0.538038	0.630573	1.8506	1.83042	1.15523	0.893062	0.104186	0.189242	0.741051	0.24472	0.250425	0.310014	0.437825	1.24431	0.665367
CD14	4.04579	4.54163	31.2185	37.2134	6.48838	44.526	85.7532	16.2829	12.172	53.1746	4.71434	7.19927	10.7557	7.7783	10.0454	156.576	234.726	197.051	169.176	173.617	45.8663	59.5697	31.3817	36.1198	46.8103	71.7047	78.7215	82.8703	78.799	73.918	372.454	581.63	437.638	392.842	625.658	192.869	267.433	223.975	193.617	233.952	1.38745	1.86545	0.845261	2.04984	1.84609	122.706	140.241	141.008	136.04
CD16	3.48863	5.14276	7.22838	5.77084	9.04663	3.636	4.41428	3.23954	3.31976	5.18797	3.83468	6.40186	2.63435	2.50524	4.79398	135.11	106.836	73.8137	35.4603	90.8605	2.2411	4.02136	2.39122	2.55569	4.38337	4.3138	13.4162	4.01342	3.70829	6.0531	20.3591	22.5067	12.7355	12.0624	17.977	7.61842	13.7463	30.6398	7.80614	16.4099	7.23748	7.36968	6.0486	6.99257	8.65985	10.0094	8.36155	8.65768	11.0256
CD11c	2.06824	3.16215	12.0908	15.5088	7.48838	0.172803	0.309438	0.0341805	0.20432	0.471128	0.222082	0.136356	3.72854	4.07395	1.0802	17.3493	16.6209	9.97997	9.48111	16.5669	0.140961	0.0866735	0	0.221974	0.219892	3.62833	3.37586	5.98631	1.82889	2.83817	110.306	124.78	87.4958	81.2574	128.45	0.527363	2.00578	2.57208	1.79942	2.04304	1.10483	1.25873	0.435643	1.19847	0.882538	2.53566	1.78825	3.26283	4.79878
HLA-DR	104.337	98.2571	70.9662	82.4866	174.523	0.382492	0.213748	3.09645	1.82731	1.17595	0.336538	0	0.244858	0.372568	0.129513	5.12009	6.37361	5.73838	4.71635	7.70757	0.0147494	0	0	0	0.137739	31.5897	60.8492	22.739	37.6199	46.4874	25.9631	37.7392	36.4498	23.837	38.4639	0.0431689	0.143858	0.634421	0.623714	0.222428	0.887699	0.837446	2.96001	2.1331	1.98558	2.13588	1.43072	6.38068	4.9956
CD123 (IL-3R)	1.64219	3.16995	7.49257	6.26372	5.81125	0.0305196	0.519837	0.236654	0.173752	0.65644	0.154773	0.662454	0.994423	3.33114	0.159905	1.19895	2.51895	2.34203	1.53515	3.30522	0	0.144175	0	0	0.11226	186.032	194.755	193.113	238.204	167.728	4.50974	6.50785	5.2549	4.68532	6.19033	0.831465	2.63025	4.31927	2.54343	3.26914	0.0959313	0.374725	0.349575	0.233448	0.368344	0.515745	1.06521	1.06201	0.999798
CD183 (CXCR3)	0	0.287979	3.3975	4.85508	0.728942	5.81359	12.8406	2.40423	1.07476	10.242	0.608787	1.60915	2.93127	0.435103	1.53349	17.714	31.4789	26.229	21.4841	26.5307	6.34015	10.3926	4.53412	4.20852	8.81323	10.6959	13.3529	8.19859	8.46848	12.8448	28.0714	49.1681	37.1859	32.2206	51.653	46.6924	59.7233	64.9702	47.7763	65.0815	0.544571	0.985934	0.398554	0.272201	0.733947	16.9385	22.7644	19.5419	16.6011
CD185 (CXCR5)	10.7345	1.95398	7.60073	4.90459	6.81824	2.77433	4.66595	1.11626	0.288997	3.60308	0.506132	1.08843	0.29856	0.922311	3.24319	11.0205	26.8741	13.4982	12.8771	12.8115	4.44003	4.61738	3.13456	3.24339	4.24401	5.99845	5.90219	3.57112	2.98241	6.5311	16.4276	23.6572	18.891	16.5819	21.2746	16.9986	22.9261	29.4774	26.3461	26.0441	0	0.0230212	0	0	0	8.48371	9.1058	8.75304	7.91356
CD194 (CCR4)	0.666103	1.11457	12.3677	24.2484	2.85362	19.6104	31.267	26.0483	16.3726	46.0885	5.48694	5.58126	13.83	4.74858	11.4762	54.4175	60.6939	59.2541	57.6423	60.8526	24.6678	23.5963	21.3885	19.5249	22.4859	44.911	33.9861	53.2361	40.2783	30.3574	127.613	179.185	164.479	146.487	215.874	185.465	168.404	227.836	235.168	147.18	0.722132	1.34131	0.969387	0.898814	3.40087	56.7545	60.5336	69.7216	63.7364
CD196 (CCR6)	17.9071	12.3214	51.7519	72.6102	24.6391	13.4131	14.7765	9.39794	7.61319	12.509	4.95651	5.99033	4.71335	3.28888	4.2337	97.8856	98.0906	174.41	150.169	65.3276	14.2896	11.8756	10.1389	12.2389	9.36673	18.597	16.0374	14.8096	13.8081	15.5369	52.2605	50.5308	53.5243	53.0206	50.264	50.9045	46.8846	66.2122	61.2956	43.1155	6.91755	4.42039	6.2993	6.71253	3.22669	34.3866	27.9572	32.8336	34.3094
CD197 (CCR7)	49.5298	41.7447	58.716	54.4003	35.9822	80.8218	112.465	15.1887	17.8297	38.178	1.72987	2.73213	1.44012	3.07711	4.15026	57.2553	63.1581	64.4332	62.4655	53.3297	14.4246	18.4956	9.70509	10.4031	14.3173	26.796	35.9199	22.7762	22.9954	24.9039	43.5012	58.2653	48.1858	44.3455	58.2504	46.9566	53.6395	91.4998	61.7543	52.7835	0.27649	1.10942	0.0985283	0.420511	2.88343	32.0214	37.596	26.6938	25.7149
[truncated: 41 more columns]
