# Supplementary material for: Deep Immune Profiling of Multiple Myeloma at Diagnosis and under Lenalidomide Maintenance Therapy
Source: MDPI journal article supplement (doi:10.3390/cancers15092604), 2023-05-04
Supplement: s1 [file Table S5.xlsx]

## Sheet: Sheet1
Table S5. Median population abundances, based on UMAP clustering and gating.
Population	GR, baseline Median (Q1-Q3), %	BR, baseline Median (Q1-Q3), %	Response Median (Q1-Q3), %	LongResponse Median (Q1-Q3), %	Relapse Median (Q1-Q3), %
Metacluster 1	3.26 (2.01-4.72)	2.94 (1.46-3.88)	5.68 (3.94-10.45)	4.91 (1.69-7.02)	4.77 (2.32-6.67)
Metacluster 2	7.01 (4.58-9.57)	5.15 (3.41-8.88)	5.74 (5.18-6.89)	7.48 (5.16-8.96)	7.68 (3.8-8.97)
Metacluster 3	0.41 (0.03-0.87)	0.51 (0.15-3.7)	0.01 (0-0.01)	0.01 (0-0.01)	0.05 (0.01-0.12)
Metacluster 4	5.13 (3.39-9.59)	2.69 (1.59-7.07)	2.8 (1.44-7.97)	5.03 (1.44-5.97)	2.18 (1.23-3.58)
Metacluster 5	5.8 (3.82-9.26)	5.68 (4.32-6.44)	8.48 (4.07-13.29)	6.01 (4.81-13.81)	6.22 (5.03-6.36)
Metacluster 6	0.57 (0.19-0.89)	0.08 (0.04-0.53)	0.63 (0.38-0.7)	0.52 (0.43-0.63)	0.19 (0.08-0.27)
Metacluster 7	9.63 (5.36-14.76)	10.32 (7.12-14.91)	6.23 (5.42-9.95)	8.5 (7.21-9.51)	7.21 (6.5-12.38)
Metacluster 8	0.71 (0.25-3.84)	6.5 (3.5-11.69)	0.04 (0.02-0.06)	0.03 (0.02-0.07)	5.17 (0.36-7.56)
Metacluster 9	9.65 (5.22-14.34)	3.74 (2.16-7.11)	14.47 (11.47-17.84)	14.25 (13.83-18.1)	4.76 (4.31-7.86)
Metacluster 10	5.22 (3.78-7.8)	3.39 (2.1-7.19)	6.39 (4.68-7.57)	6.24 (4.98-6.58)	5.09 (3.23-5.55)
Metacluster 11	0.13 (0.09-0.15)	0.12 (0.11-0.37)	0.47 (0.29-1)	0.37 (0.09-0.5)	0.37 (0.24-1.07)
Metacluster 12	18.23 (17.65-23.96)	19.01 (14.95-28.58)	16.62 (13.99-20.62)	22.61 (19.61-28.24)	20.83 (15.95-22.86)
Metacluster 13	1.26 (0.96-1.96)	3.3 (2.19-3.95)	1.31 (0.52-2.27)	0.45 (0.26-1.35)	5.17 (4.17-5.46)
Metacluster 14	7.1 (3.06-8.07)	3.23 (1.53-4.03)	1.61 (0.97-4.09)	2.67 (1.91-3.78)	2.54 (2.25-3.46)
Metacluster 15	4.37 (2.94-8.83)	2.26 (1.87-7.1)	13.31 (3.99-16.55)	9.13 (4.26-13.55)	2.72 (2.43-5.42)
Metacluster 16	0.16 (0.05-0.36)	0.01 (0.01-0.03)	0.16 (0.07-0.44)	0.24 (0.1-0.52)	0.05 (0.02-0.1)
Metacluster 17	2.89 (1.72-4.55)	2.32 (1.52-5.47)	5.33 (2.12-8.24)	2.45 (1.26-6.93)	5.33 (1.71-12.39)
Metacluster 18	0.17 (0.12-2.57)	0.18 (0.02-1.13)	0.21 (0.19-0.29)	0.28 (0.21-0.35)	0.2 (0.11-0.23)
