# Supplementary material for: Deep Immune Profiling of Multiple Myeloma at Diagnosis and under Lenalidomide Maintenance Therapy
Source: Cancers (Basel). 2023 May 4;15(9):2604. doi: 10.3390/cancers15092604 (PMC10177338; doi:10.3390/cancers15092604)
Supplement: Supplementary file 1 [file cancers-15-02604-s001.zip]

Archive with 5 entries (5 files):
- Supplementary.pdf
- Table S2.xlsx
- Table S3.xlsx
- Table S4.xlsx
- Table S5.xlsx
